# Supplementary material for: CD4+ T cells produce IFN-I to license cDC1s for induction of cytotoxic T-cell activity in human tumors
Source: PubMed Central journal article supplement (PMC10978876; doi:10.1038/s41423-024-01133-1), 2024-02-21

|          |   | CD4 <sup>+</sup> T-cell<br>(donor1) |   |   |   | CD4 <sup>+</sup> T-cell<br>(donor2) |   |   |  | THP-1 |        |
|----------|---|-------------------------------------|---|---|---|-------------------------------------|---|---|--|-------|--------|
| CD3/CD28 | - | -                                   | - | - | + | +                                   | + | + |  | Ctrl. | G3-YSD |
| cGAMP    | - | +                                   | - | + | - | +                                   | - | + |  |       |        |

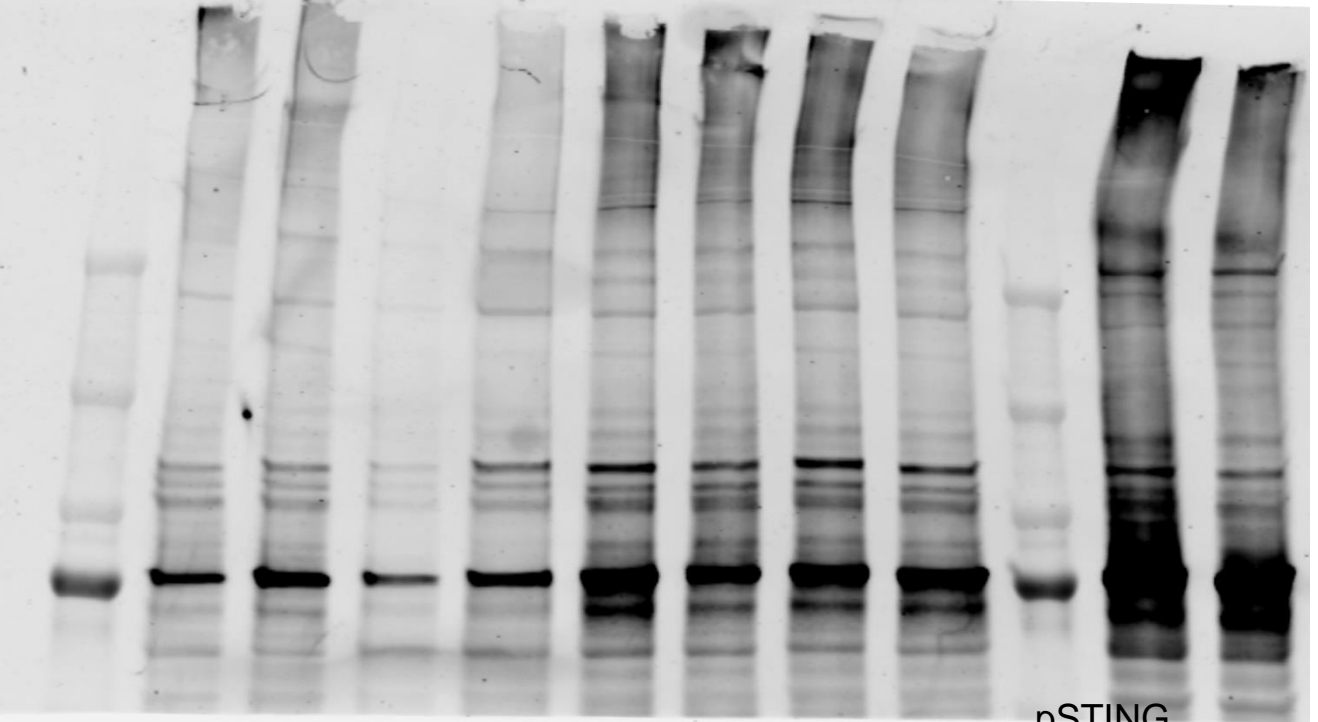

pSTING

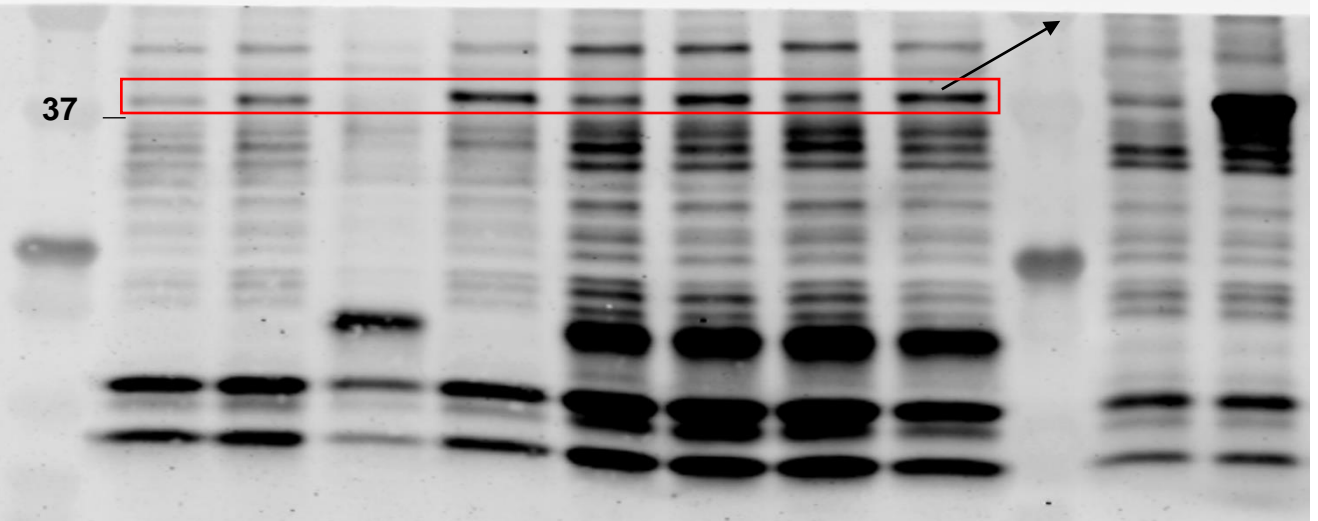

37

|          | CD4 <sup>+</sup> T-cell<br>(donor1) |   |   |   | CD4 <sup>+</sup> T-cell<br>(donor2) |   |   |   | THP-1  |       |
|----------|-------------------------------------|---|---|---|-------------------------------------|---|---|---|--------|-------|
| CD3/CD28 | -                                   | - | - | - | +                                   | + | + | + | Ctrl.  | THP-1 |
| cGAMP    | -                                   | + | - | + | -                                   | + | - | + | G3-YSD |       |

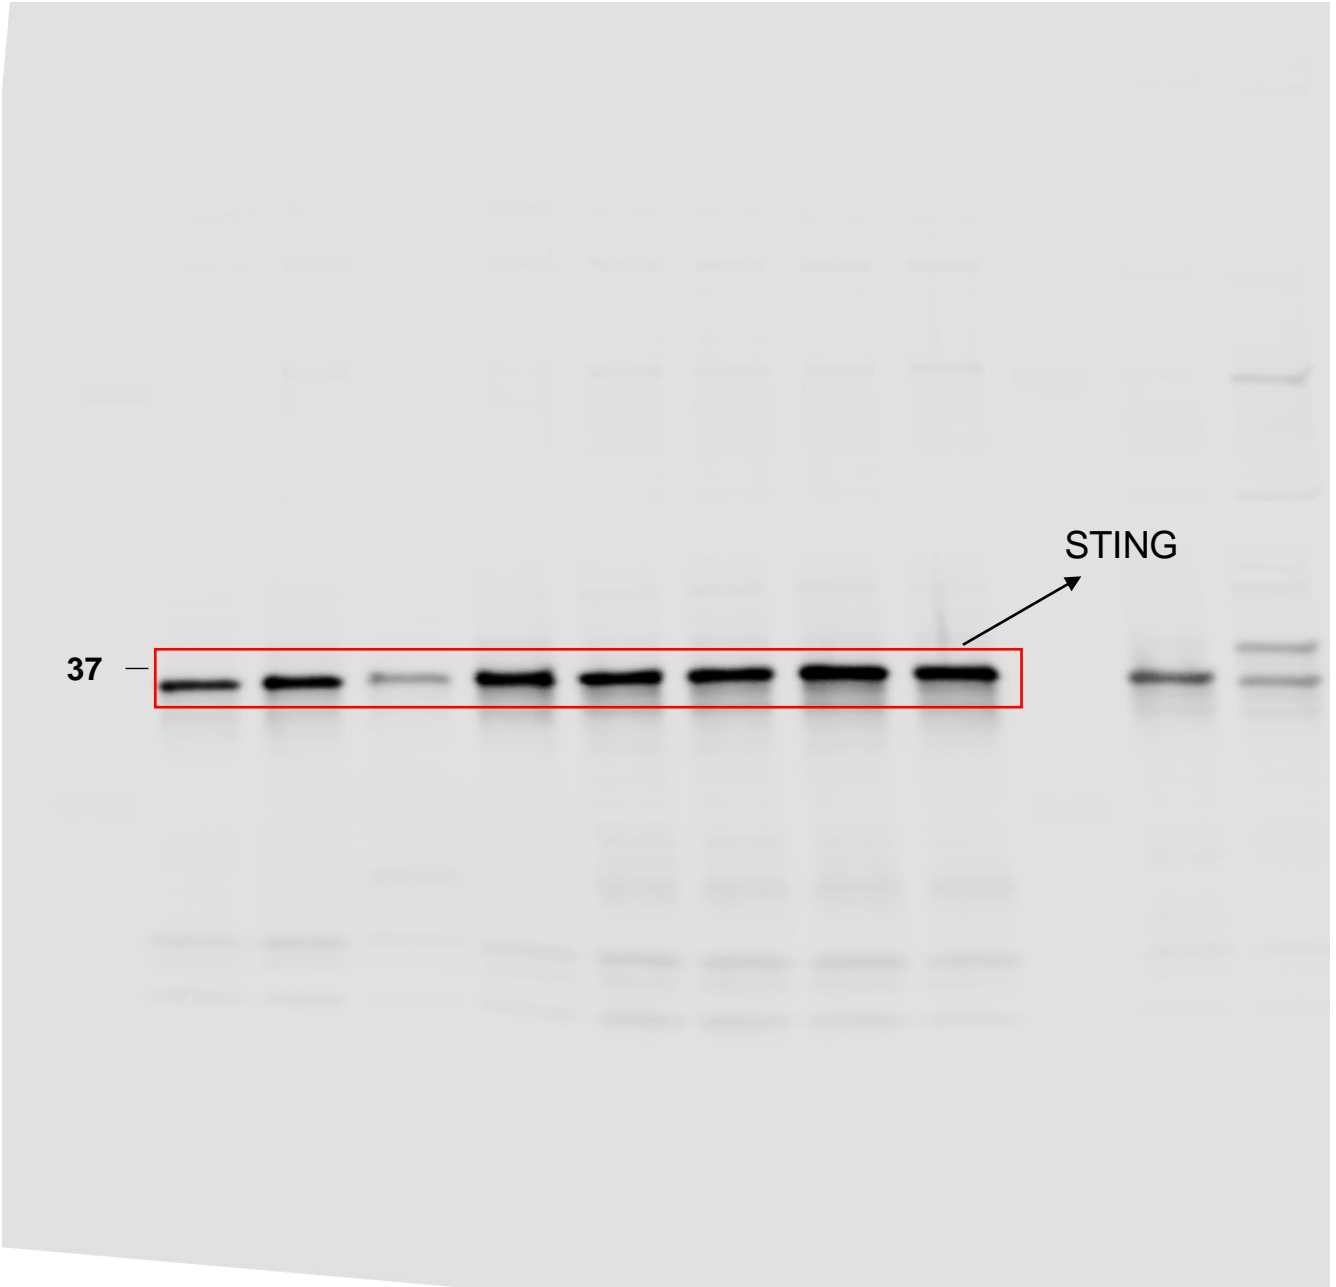

|          |   | CD4 <sup>+</sup> T-cell<br>(donor1) |   |   |   | CD4 <sup>+</sup> T-cell<br>(donor2) |   |   |        | THP-1 |  |
|----------|---|-------------------------------------|---|---|---|-------------------------------------|---|---|--------|-------|--|
| CD3/CD28 | - | -                                   | - | - | + | +                                   | + | + | Ctrl.. | THP-1 |  |
| cGAMP    | - | +                                   | - | + | - | +                                   | - | + | G3-YSD |       |  |

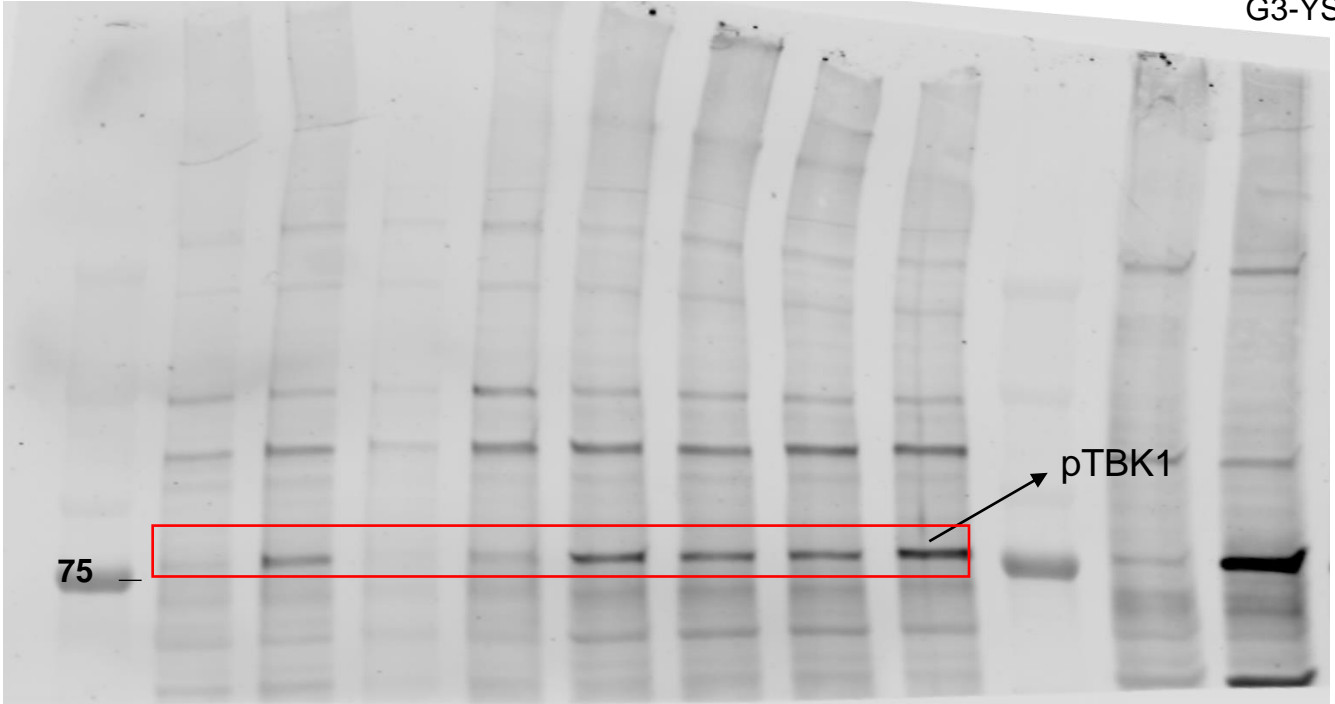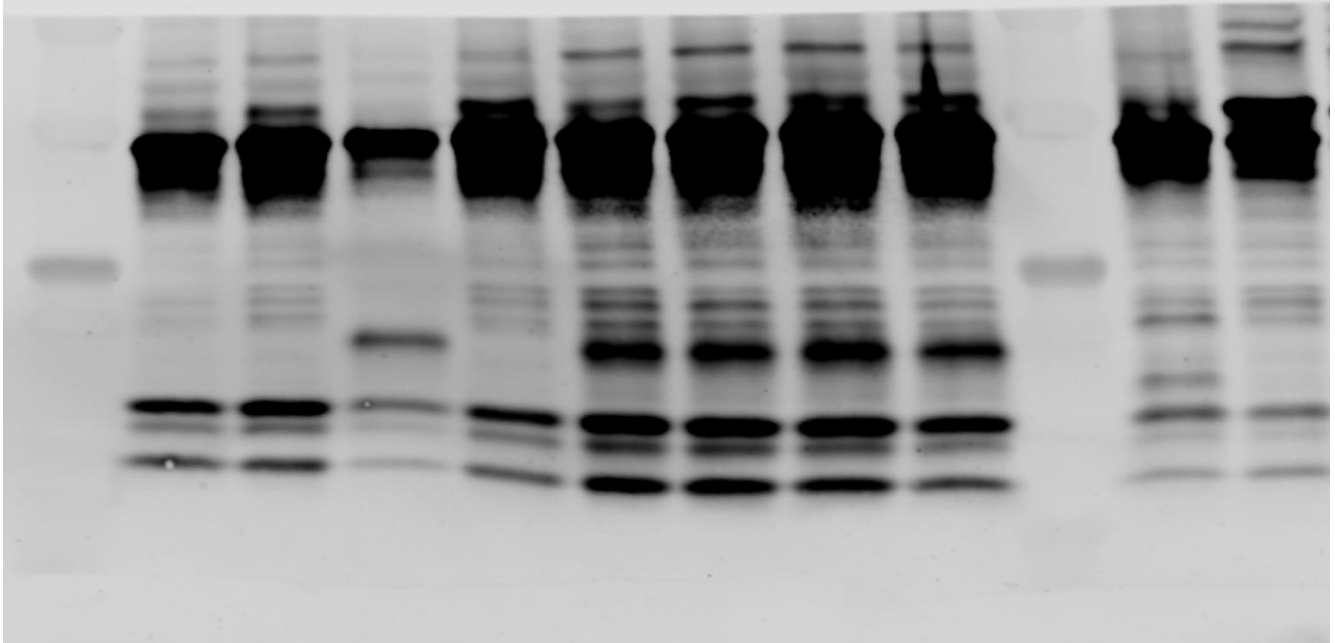

|          | CD4 <sup>+</sup> T-cell<br>(donor1) |   |   |   | CD4 <sup>+</sup> T-cell<br>(donor2) |   |   |   | THP-1 |                 |
|----------|-------------------------------------|---|---|---|-------------------------------------|---|---|---|-------|-----------------|
|          |                                     |   |   |   |                                     |   |   |   | Ctrl. | THP-1<br>G3-YSD |
| CD3/CD28 | -                                   | - | - | - | +                                   | + | + | + |       |                 |
| cGAMP    | -                                   | + | - | + | -                                   | + | - | + |       |                 |

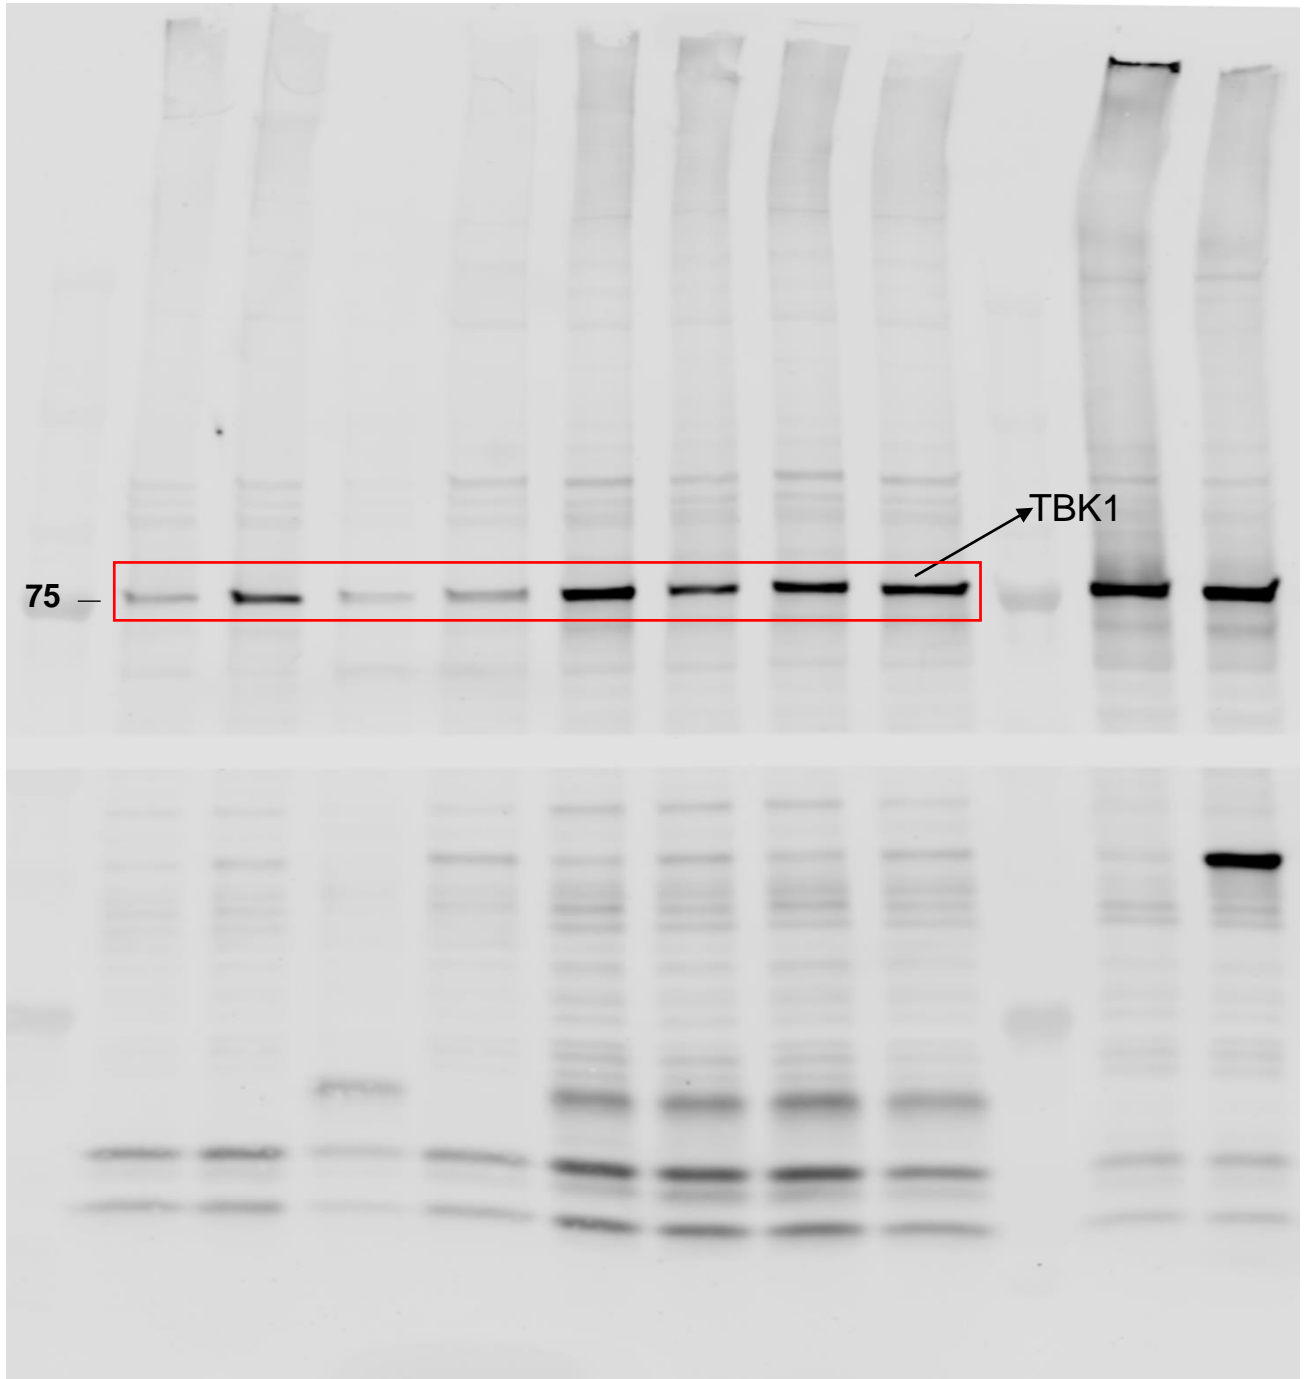

|          | CD4+ T-cell<br>(donor1) |   |   |   | CD4+ T-cell<br>(donor2) |   |   |   | THP-1 |                 |
|----------|-------------------------|---|---|---|-------------------------|---|---|---|-------|-----------------|
| CD3/CD28 | -                       | - | - | - | +                       | + | + | + | Ctrl. | THP-1<br>G3-YSD |
| cGAMP    | -                       | + | - | + | -                       | + | - | + |       |                 |

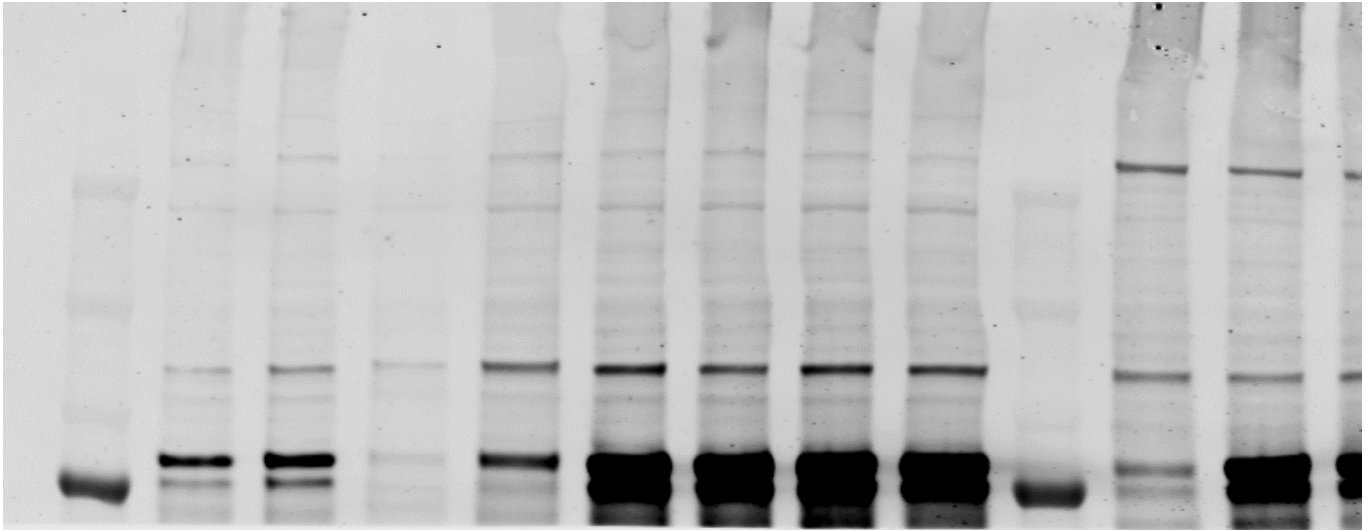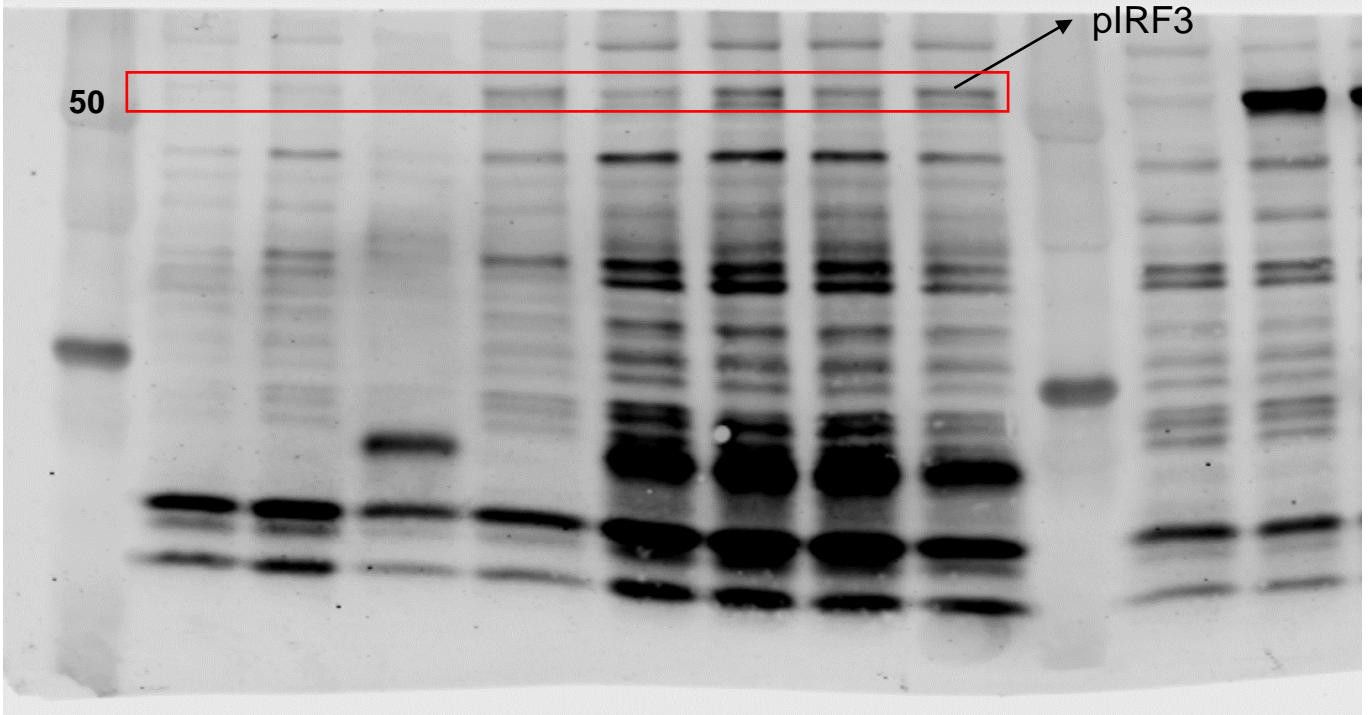

|          | CD4 <sup>+</sup> T-cell<br>(donor1) |   |   |   | CD4 <sup>+</sup> T-cell<br>(donor2) |   |   |   | THP-1  |       |
|----------|-------------------------------------|---|---|---|-------------------------------------|---|---|---|--------|-------|
| CD3/CD28 | -                                   | - | - | - | +                                   | + | + | + | Ctrl.  | THP-1 |
| cGAMP    | -                                   | + | - | + | -                                   | + | - | + | G3-YSD |       |

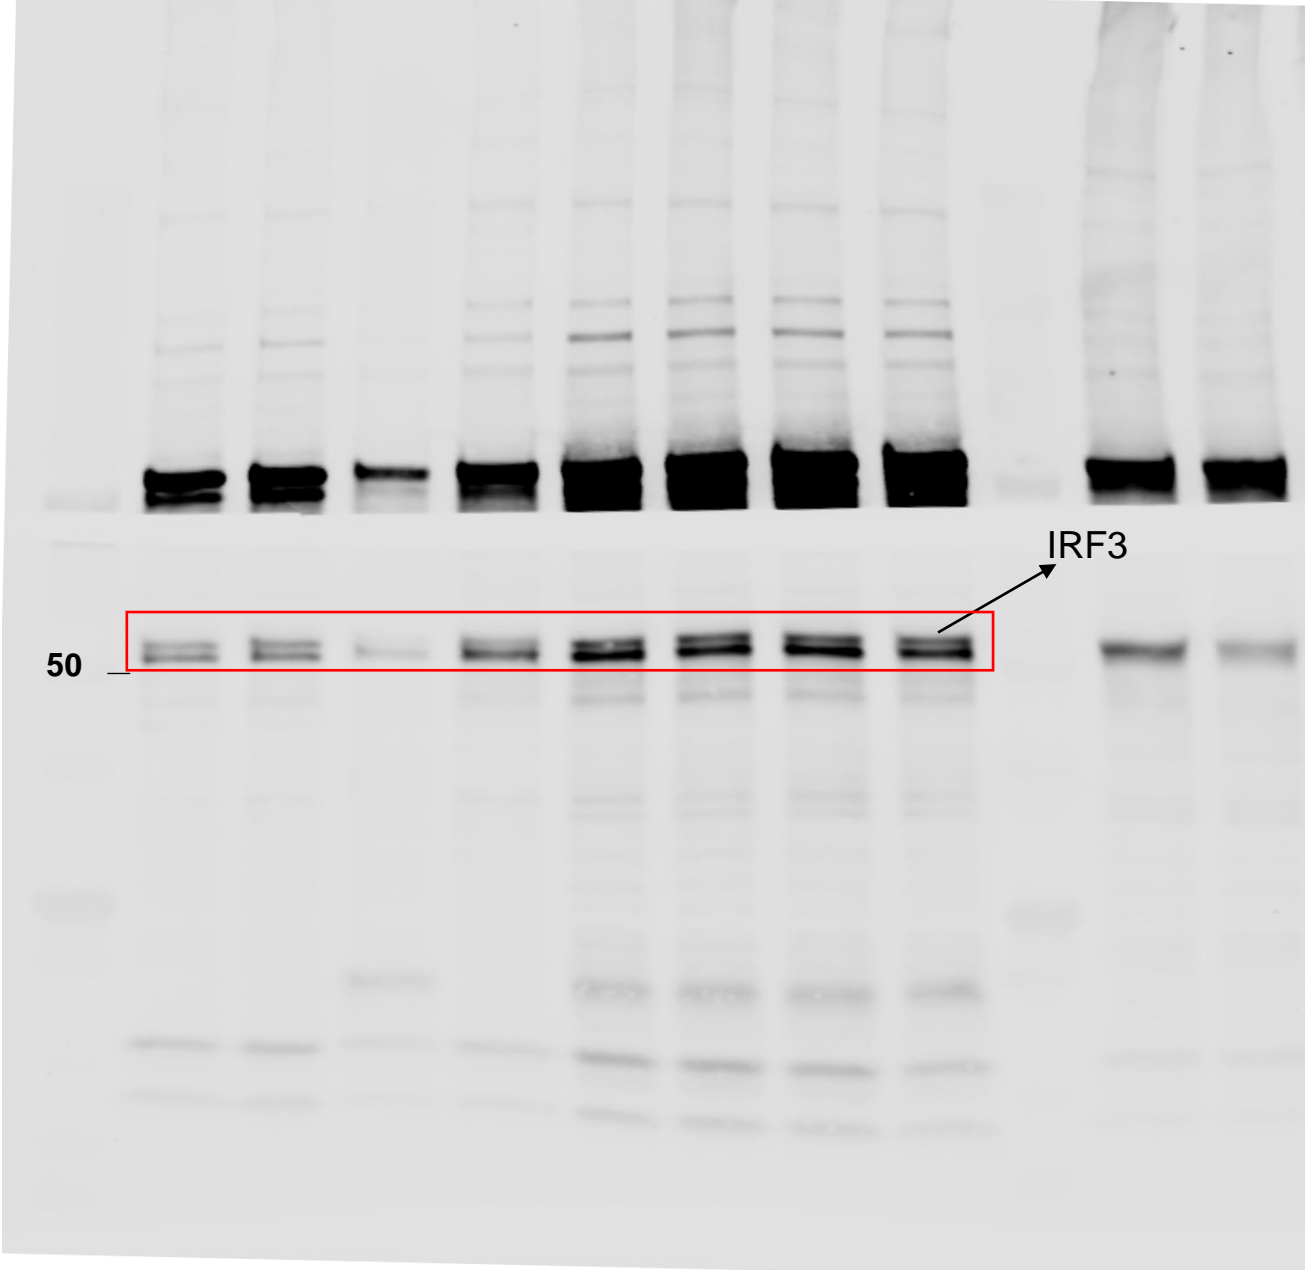

|          | CD4 <sup>+</sup> T-cell<br>(donor1) |   |   |   | CD4 <sup>+</sup> T-cell<br>(donor2) |   |   |   | THP-1 |        |
|----------|-------------------------------------|---|---|---|-------------------------------------|---|---|---|-------|--------|
| CD3/CD28 | -                                   | - | - | - | +                                   | + | + | + | Ctrl. | THP-1  |
| cGAMP    | -                                   | + | - | + | -                                   | + | - | + |       | G3-YSD |

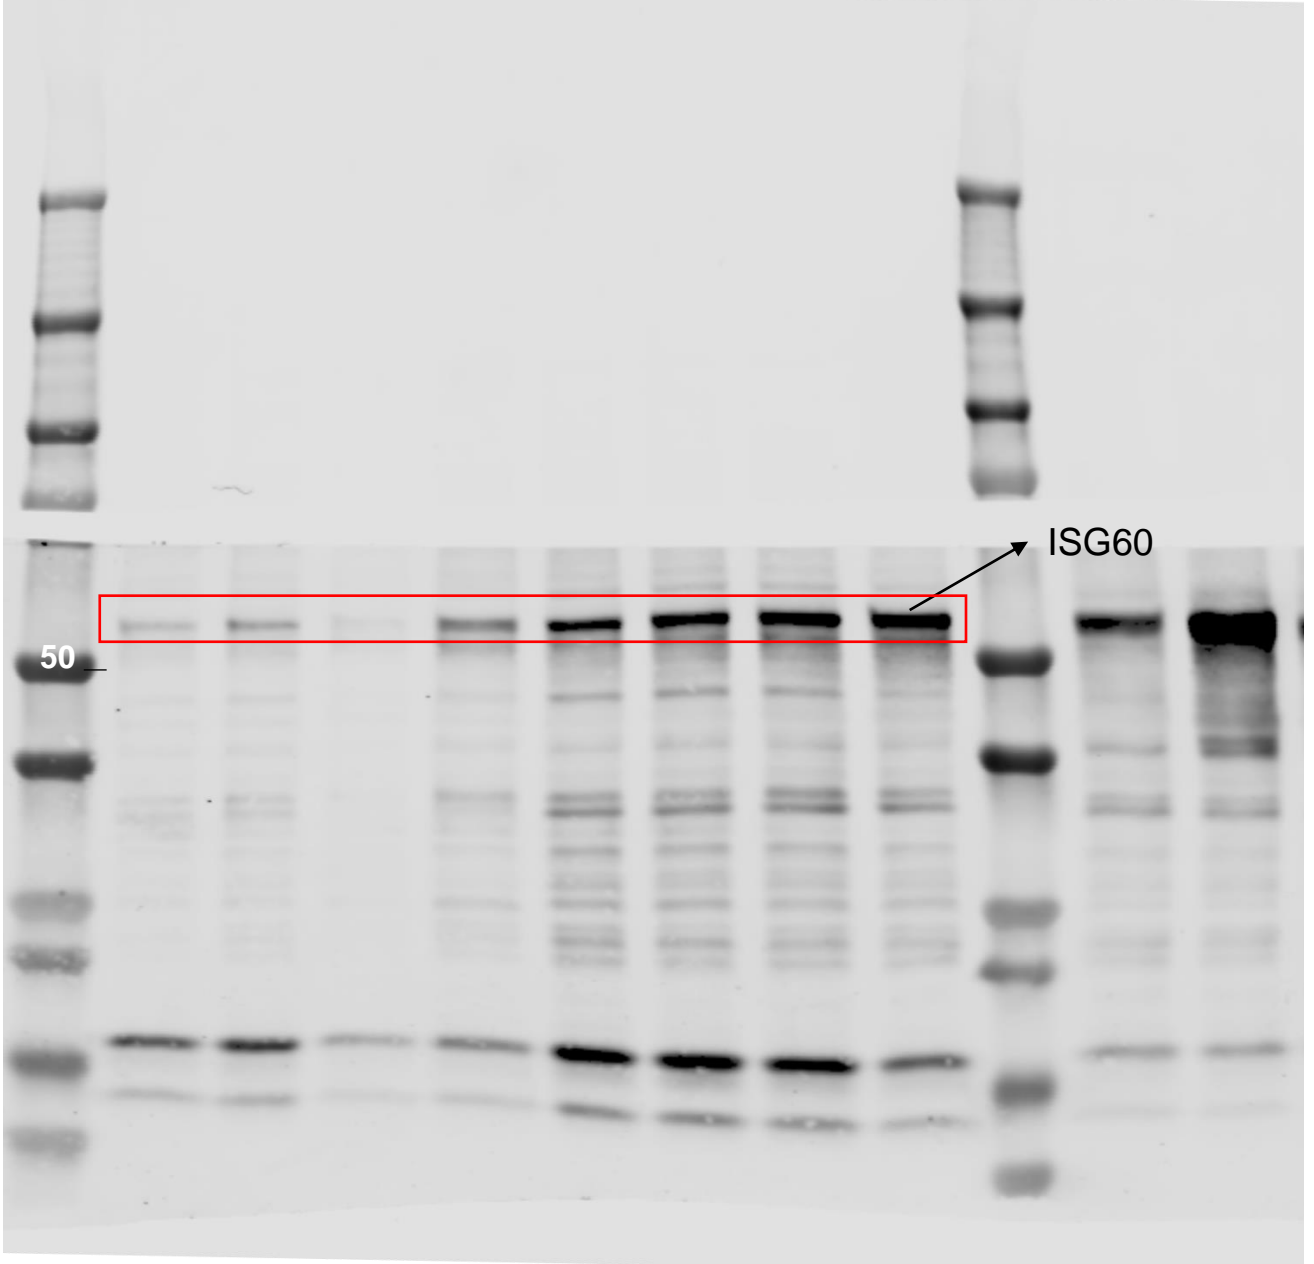

|          |   | CD4 <sup>+</sup> T-cell<br>(donor1) |   |   |   | CD4 <sup>+</sup> T-cell<br>(donor2) |   |   |        | THP-1 |  |
|----------|---|-------------------------------------|---|---|---|-------------------------------------|---|---|--------|-------|--|
| CD3/CD28 | - | -                                   | - | - | + | +                                   | + | + | Ctrl.  | THP-1 |  |
| cGAMP    | - | +                                   | - | + | - | +                                   | - | + | G3-YSD |       |  |

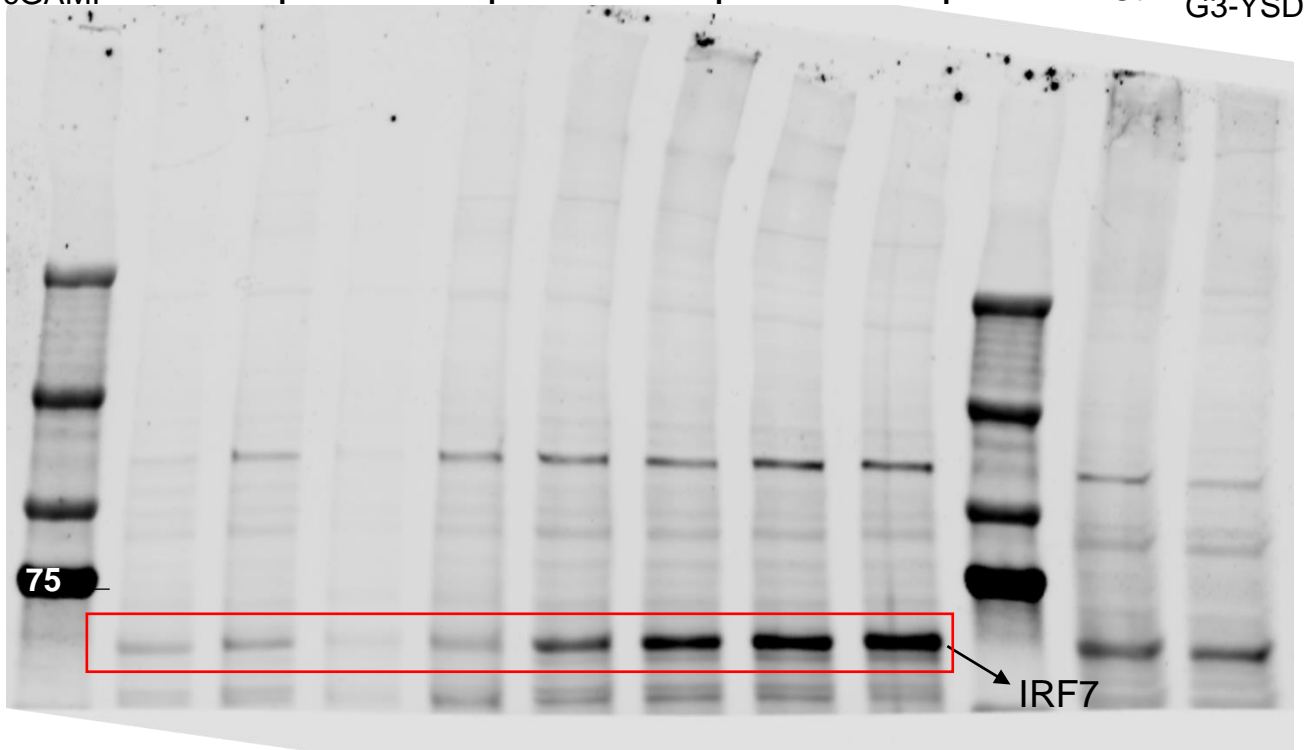



|          | CD4 <sup>+</sup> T-cell<br>(donor1) |   |   |   | CD4 <sup>+</sup> T-cell<br>(donor2) |   |   |   | THP-1  |       |
|----------|-------------------------------------|---|---|---|-------------------------------------|---|---|---|--------|-------|
| CD3/CD28 | -                                   | - | - | - | +                                   | + | + | + | Ctrl.  | THP-1 |
| cGAMP    | -                                   | + | - | + | -                                   | + | - | + | G3-YSD |       |

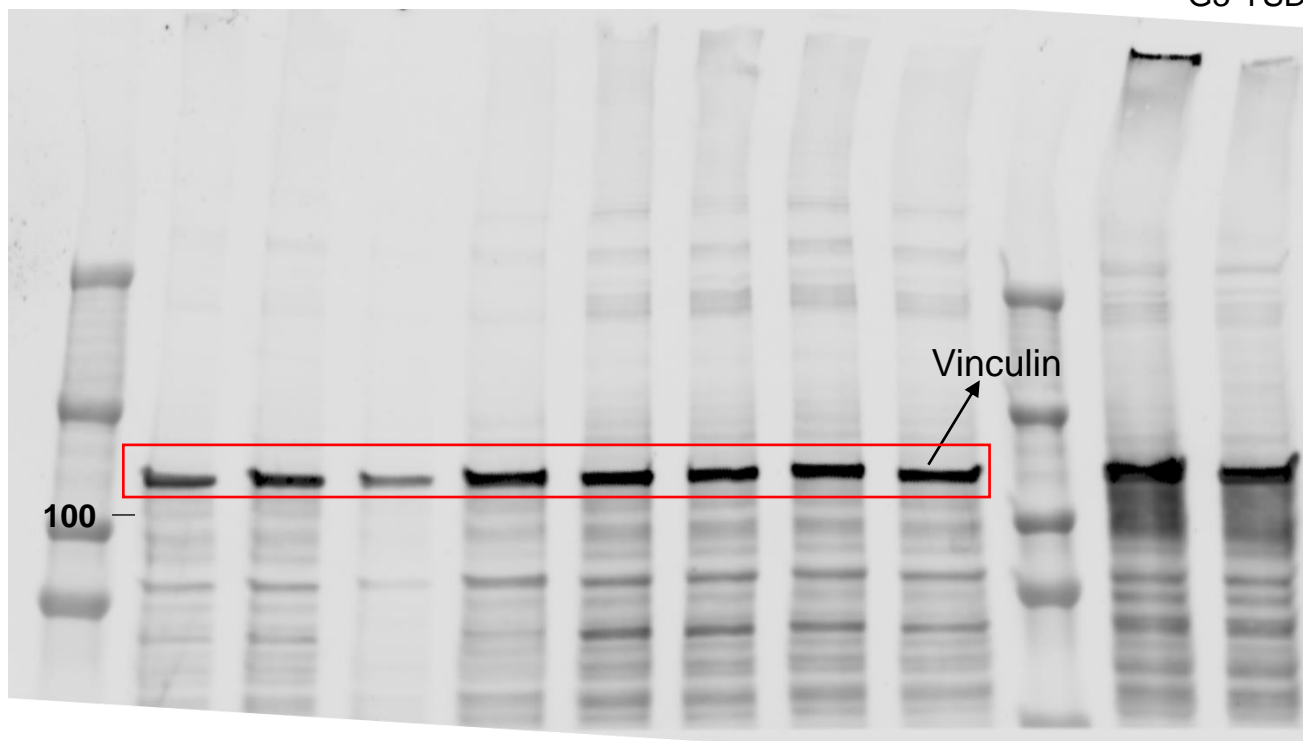

Supplement: 41423_2024_1133_MOESM11_ESM.pdf [file 41423_2024_1133_MOESM11_ESM.pdf]
